# Supplementary material
Source: PubMed Central journal article supplement (PMC6430237)
Supplement: NIHMS1503813-supplement-Supp1.pdf [file NIHMS1503813-supplement-Supp1.pdf]

# 1 APPENDIX: Examples of images

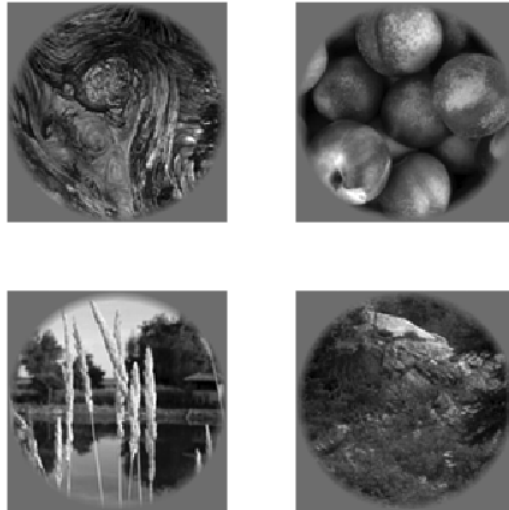

Figure 1: Four randomly selected examples of validation images from the top cluster of images in Figure 11.

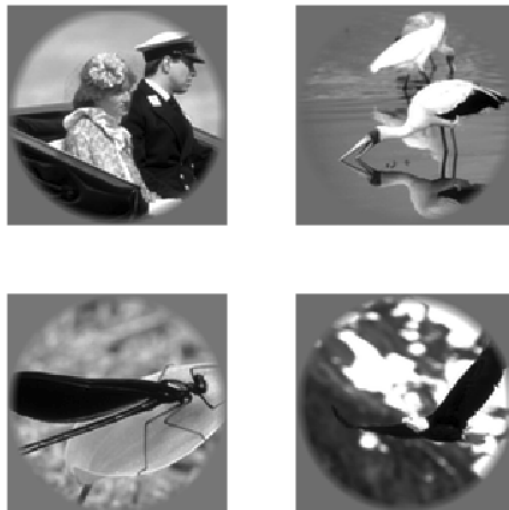

Figure 2: Four randomly selected examples of validation images from the bottom cluster of images in Figure 11.
